# Supplementary material
Source: ML conference proceedings conference paper supplement (https://proceedings.neurips.cc/paper_files/paper/2020/hash/066ca7bf90807fcd8e4f1eaef4e4e8f7-Abstract.html)
Supplement: Supplementary file [file 066ca7bf90807fcd8e4f1eaef4e4e8f7-Supplemental.pdf]

---

# Suppl. Material: Exploiting weakly supervised visual patterns to learn from partial annotations

---

Anonymous Author(s)  
Affiliation  
Address  
email

## 1 Additional Results

### 2 1.1 Synthetically generated partially annotated datasets

#### 3 1.1.1 Knowledge-graph based partially annotated dataset generation

4 The knowledge graph used for the MS COCO panoptic segmentation dataset results [7] in Appendix B.

### 5 1.2 Real partially annotated datasets

6 In this section, we discuss results on the LVIS dataset [6]. LVIS dataset has 57K training and 5K test  
7 images with 1200 categories. The label categories are categorized into three categories based on their  
8 frequencies. We use the two highest frequency ones which result in 776 label categories. We use  
9 3332 images from the training set for our validation set while maintaining the same label distribution.

10 **Experimental details.** We followed the same network (ResNeXt101 pretrained on ImageNet) and  
11 optimization strategies as used in [14]. The networks have been trained using the sgd optimizer with  
12 an initial learning rate of 0.001, momentum of 0.9 and weight decay of 0.0005. The learning rate is  
13 decreased by a factor of 10 at the end of 10<sup>th</sup> and 20<sup>th</sup> epochs. We use a batch size of 24 with the  
14 input image dimension as  $224 \times 224$ . The networks are trained for 36 epochs. During testing we  
15 choose the model which has the highest mAP score on the validation dataset.

16 **Results.** We report the performance of the models on the test set of the LVIS benchmark in Tab. 1.  
17 Since the all the labels for the test images are not annotated, we only evaluate the performance of  
18 our model on the set of annotated labels. Hence false positive can happen only if a positively  
19 annotated label is predicted as a negative class. Similarly, false negative can happen only if  
20 a negatively annotated label is predicted as a positive class. We observe that our approach  
21 performs significantly better compared to the baseline models by a margin of  $\sim 2\%$ .

### 22 1.3 Partial label annotations when training models across multiple datasets

23 One of the common scenarios where datasets are partially annotated is when we have multiple  
24 datasets. Let us consider two datasets as shown in Fig. 1. We observe the following sources of partial  
25 label annotations.

- 26 1. *Missing instance:* This problem occurs when a thing/stuff is visually present in the image,  
27 but any visual concept related to that thing/stuff was not defined while that dataset was  
28 annotated. Let's say that the label TENNIS is present in both datasets, while PERSON, TENNIS  
29 RACKET is present only in  $\mathcal{D}_2$ . If the image in Fig. 1 (b) is present in  $\mathcal{D}_1$ , it will be labeled  
30 as tennis. However, if the image in Fig. 1 (c) is present in  $\mathcal{D}_2$ , it will be labeled as TENNIS,  
31 PERSON, TENNIS RACKET. In this case, while each of the latter categories are present  
32 visually in  $\mathcal{D}_1$ , they can be considered as negative during training. However, they would be

| Training Strategy | NE    | wNE [3] | FE    | LS    | SE-I (Ours) | SE-L (Ours) | SE (Ours)    |
|-------------------|-------|---------|-------|-------|-------------|-------------|--------------|
| mAP               | 19.14 | 22.45   | 22.18 | 22.56 | 22.51       | 23.76       | <b>24.11</b> |

Table 1: LVIS results

|        |                                                                                                                                         |                                                                                   |                                                                                                                                                                                         |
|--------|-----------------------------------------------------------------------------------------------------------------------------------------|-----------------------------------------------------------------------------------|-----------------------------------------------------------------------------------------------------------------------------------------------------------------------------------------|
| Images |                                                        |  |                                                                                                      |
|        | Pos<br>Man, Human head, Human arm, Human hair, Clothing, Girl, Human mouth, Cosplay, Woman, Person, Costume, Human face, Superhero, Boy | Real tennis                                                                       | Real tennis, Racketlon, Tennis skirt, Person, Woman, Sports equipment, Clothing, Ball, Strings, Tennis Equipment, Tennis player, Tennis, Soft tennis, Racquet sport, Human face, Racket |
|        | Neg<br>Comics, Convention, Anime                                                                                                        | Tennis polo                                                                       | Hockey, Girl, Rackets, Soccer, Tennis polo, Statue, Basketball (Sport), Elbow, Baseball, Bowling                                                                                        |
|        | (a)                                                                                                                                     | (b)                                                                               | (c)                                                                                                                                                                                     |

Figure 1: Types of partial label annotations

33 considered as positives in  $\mathcal{D}_2$ . This discrepancy could result in sub-optimal performance,  
 34 especially when this is a frequently occurring phenomena.

35 2. *Fine-grained mismatch problem*: This problem occurs when a parent label (*e.g.* person) is  
 36 present in both  $\mathcal{D}_1$  and  $\mathcal{D}_2$  datasets, but the child label(s) (*e.g.* MAN, GIRL) is present only  
 37 in one of the datasets, say  $\mathcal{D}_2$ . For example, if the image in Fig. 1 (a) is present only in  $\mathcal{D}_1$ ,  
 38 it would be labeled as PERSON. But if the image in Fig. 1 (b) is present in  $\mathcal{D}_2$ , it would be  
 39 labeled as PERSON, MAN. This discrepancy in labeling could affect the embedding space to  
 40 get confused whether labels like PERSON, MAN, GIRL are related to the same visual concept  
 41 or not.

42 Thus even if the datasets are fully and correctly annotated, partial labels can still occur while  
 43 training across multiple datasets. Learning paradigms such as *lifelong learning*, *continual learning*,  
 44 *incremental learning* have been developed to keep training a model on increasing label sets. However,  
 45 incremental learning approaches suffer from the catastrophic forgetting problem [4, 5, 11, 12, 13].  
 46 Even current state of the art approaches have a forgetting rate of 10 – 15%. We study the partial  
 47 annotation problem here and use the baselines described in the paper and our training approach  
 48 to analyze this problem from the multi-dataset training perspective. One of the key differences of  
 49 this approach compared to incremental learning approaches is that we do use all the images across  
 50 all datasets, which is more expensive in terms of memory used to train our network. We do not  
 51 propose this approach as an incremental learning approach, but provide a new “oracle” baseline for  
 52 the incremental learning approaches.

53 We use the CIFAR100 [8] and MS COCO panoptic segmentation [7] datasets for this purpose.

### 54 1.3.1 Multi-label CIFAR dataset

55 We used the CIFAR-100 dataset [8] for this purpose. There are 20 super-classes, each of which have  
 56 5 children, forming a total of 100 classes. We added more labels to this structure to replicate a similar  
 57 hierarchy structure such as RKGv2. The root of the tree sub-divides into two children, NATURAL and  
 58 THINGS. Their sub-trees are shown in Fig. 9 in Appendix A. We defined the subsets in the manner as  
 59 shown in Tab. 2. The common classes to both datasets are LARGE\_MAN-MADE\_OUTDOOR\_THINGS  
 60 and PEOPLE and its leaf classes, *i.e.*, images of these classes are labeled just as is for both datasets.  
 61 Second row has the images belonging to the sub-tree corresponding to the left class being labeled as  
 62 as the right-class for the Dataset 1. The third row has the similar thing, but for Dataset 2. Roughly

|                                    |                                                                                                  |
|------------------------------------|--------------------------------------------------------------------------------------------------|
| Common super-classes               | LARGE_MAN-MADE_OUTDOOR_THINGS, PEOPLE                                                            |
| Missing super-classes in Dataset 1 | HOUSEHOLD_ELECTRICAL_DEVICES → HOUSEHOLD_ITEMS<br>VEHICLES_1 → VEHICLES<br>VEHICLES_2 → VEHICLES |
| Missing super-classes in Dataset 2 | FLOWERS → NATURAL<br>FRUIT_AND_VEGETABLES → NATURAL                                              |

Table 2: Subset class groups for multi-label CIFAR-100 dataset.

| Scenario | Wide ResNet   |               |               |               | DenseNet      |               |               |               |
|----------|---------------|---------------|---------------|---------------|---------------|---------------|---------------|---------------|
|          | Validation    |               | Test          |               | Validation    |               | Test          |               |
|          | mAP           | meanF1        | mAP           | meanF1        | mAP           | meanF1        | mAP           | meanF1        |
| Oracle   | 0.7686        | 0.7717        | 0.7638        | 0.7483        | 0.7789        | 0.7739        | 0.7818        | 0.7538        |
| FE       | 0.6743        | 0.70006       | 0.6789        | 0.6713        | 0.6618        | 0.7101        | 0.6972        | 0.6847        |
| NE       | 0.6551        | 0.6789        | 0.6529        | 0.6515        | 0.6955        | 0.7153        | 0.6982        | 0.6868        |
| wNE      | 0.6712        | 0.6885        | 0.6553        | 0.6546        | 0.7074        | 0.71140       | 0.7020        | 0.6827        |
| LS       | 0.6896        | 0.7052        | 0.6868        | 0.6748        | 0.7124        | 0.7165        | 0.7113        | 0.6887        |
| SE-I     | 0.7135        | 0.7202        | 0.7017        | 0.6878        | 0.7427        | 0.7440        | 0.7332        | 0.7101        |
| SE-L     | 0.7536        | 0.7428        | 0.7533        | 0.7114        | 0.7749        | 0.7546        | 0.7851        | 0.7322        |
| SE       | <b>0.7766</b> | <b>0.7570</b> | <b>0.7729</b> | <b>0.7228</b> | <b>0.7914</b> | <b>0.7690</b> | <b>0.7909</b> | <b>0.7360</b> |

Table 3: Mean AP and Mean F1 score on the Validation and Test sets of Multi-label CIFAR-100

63 Dataset 1 have 3x more data as the Dataset 2, with a total of 45k images across both. The validation  
64 and test sets have 5k and 10k image respectively.

65 **Experimental Details.** We experimented on 40-layer Wide Resnets and DenseNets, with wide factor  
66 of 4 and growth rate of 40 respectively. We use the same training schemes as in the original Wide  
67 Resnet and DenseNet papers.

68 **Results.** We show the mean F1 scores on the validation and test sets in Tab. 3.

69 In Fig. 2, we analyze the performance based on different categories of how the labels are annotated  
70 in our CIFAR100 subset datasets. The temperature based model corresponds to our proposed SE  
71 approach. The different label categorizations are defined above.

72

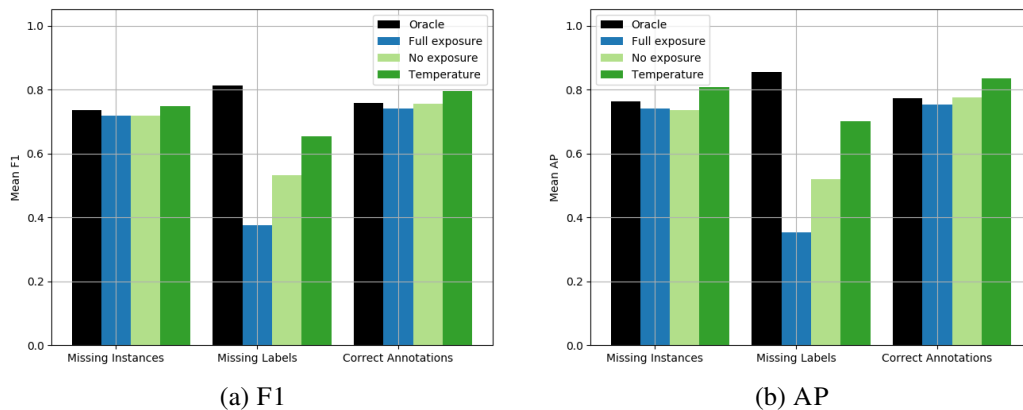

Figure 2: Subset Category-wise performance on CIFAR100 test set

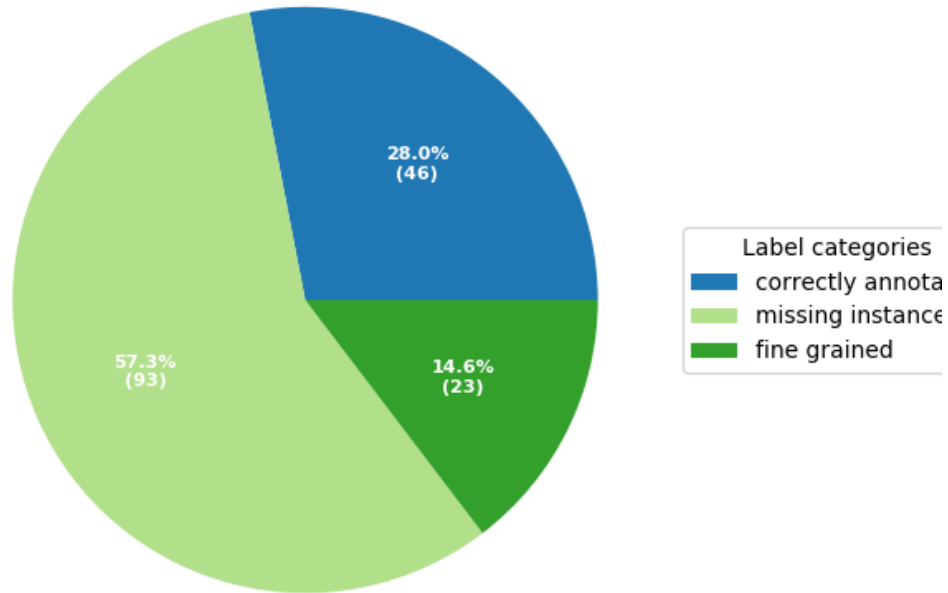

Figure 3: MS COCO Label Categorization Statistics

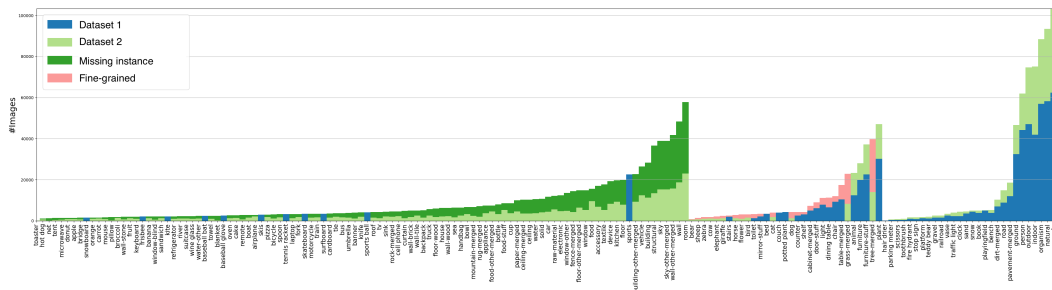

Figure 4: MS COCO Label-wise Image Frequency Statistics

### 73 1.3.2 MS-COCO panoptic segmentation dataset

74 In this section, we show results on the MS-COCO panoptic segmentation dataset [10, 7] which  
 75 includes 80 thing categories and 53 stuff categories. for this purpose. To build the knowledge graph,  
 76 we start from the one defined in [1]. We add some additional parent labels such as ROOM, MAN-MADE,  
 77 ORGANISM, DEVICE and NATURAL. The final knowledge graph is shown in Appendix B. The final  
 78 number of all classes in the dataset is 164.

79 We divide the classes in a way such that the number of labels in Dataset 1 is 57 and the number  
 80 of labels in Dataset 2 is 139 while having 32 labels in common. The category specific pie charts  
 81 which show the categorization of labels are shown in Fig. 3. This results in 46 labels being correctly  
 82 annotated, *i.e.*, the number of images that contain these labels match the oracle scenario. In this  
 83 setting, there are 93 labels that suffer from the *missing instance* problem and 23 labels suffer from  
 84 the *fine-grained mismatch* problem. The label-wise statistics are shown in Fig. 4. The number of  
 85 training images in the Datasets 1 and 2 is  $\sim 67\text{K}$  (58%) and  $\sim 48\text{K}$  (42%) respectively.

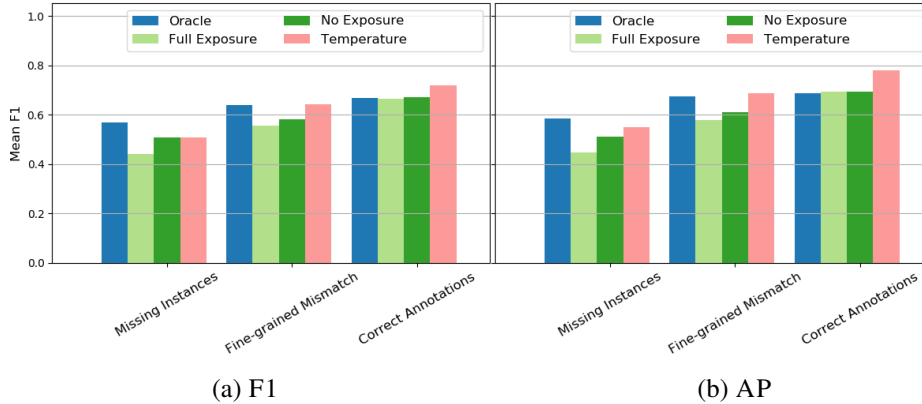

Figure 5: Subset Category-wise performance on MS COCO test set

86

87 **Overall Results.** We followed the same network (ResNeXt101 pretrained on ImageNet) and opti-  
 88 mization strategies as used in [14, 3]. We plot the mean F1 scores on the validation set as a function  
 89 of epochs in Fig. 5(a). Using our proposed SE approach improves the performance over naive  
 90 full-exposure and no-exposure settings (and also the oracle model!).

91 **Quantitative results on different types of missing label problems.** In Fig. 5, we analyze the  
 92 performance based on different categories of how the labels are annotated in our MS COCO subset  
 93 datasets. The labels which are correctly annotated in both subsets (*Correct Annotations*) have the  
 94 best performance.

95

96 **Performance vs fraction of missing labels.** In Fig. 6, we plot the label-wise difference of the  
 97 AP performance of our approach compared with that of the ORACLE, FULL EXPOSURE and NO  
 98 EXPOSURE settings. Red represents labels with the missing instance problem, green indicates the  
 99 labels with the fine-grained mismatch problem and blue represents the labels which are correctly  
 100 annotated. Within each categorization, the labels are sorted based on the improvement in the  
 101 performance of our approach. The darkest color coding of the bar represents lesser noise in the  
 102 label annotation, while the brightest color coding indicates more noise in the label annotations. We  
 103 observe that as the fraction of noisy annotations increase, the performance of ORACLE and the NO  
 104 EXPOSURE settings are better than ours. Hence when the noisy annotations are less, using fully  
 105 exposed label space with some temperature parameter helps the overall performance. For fine-grained  
 106 labels, we perform better than the no-exposure setting for most categories.

107

108 **Performance vs #oracle annotations.** In Fig. 7, we plot the label-wise difference in performances  
 109 where the brightness of the color bars vary based on the # oracle annotations. For the ORACLE and  
 110 NO EXPOSURE settings, we observe that our approach works better for labels which have lesser #  
 111 number of annotations. As the number of annotations increase, we are similar to the baseline settings.

112

## 113 References

- 114 [1] Holger Caesar, Jasper Uijlings, and Vittorio Ferrari. Coco-stuff: Thing and stuff classes in context. In  
 115 *CVPR*, pages 1209–1218, 2018.
- 116 [2] Francisco M Castro, Manuel J Marín-Jiménez, Nicolás Guil, Cordelia Schmid, and Karteek Alahari.  
 117 End-to-end incremental learning. In *ECCV*, pages 233–248, 2018.

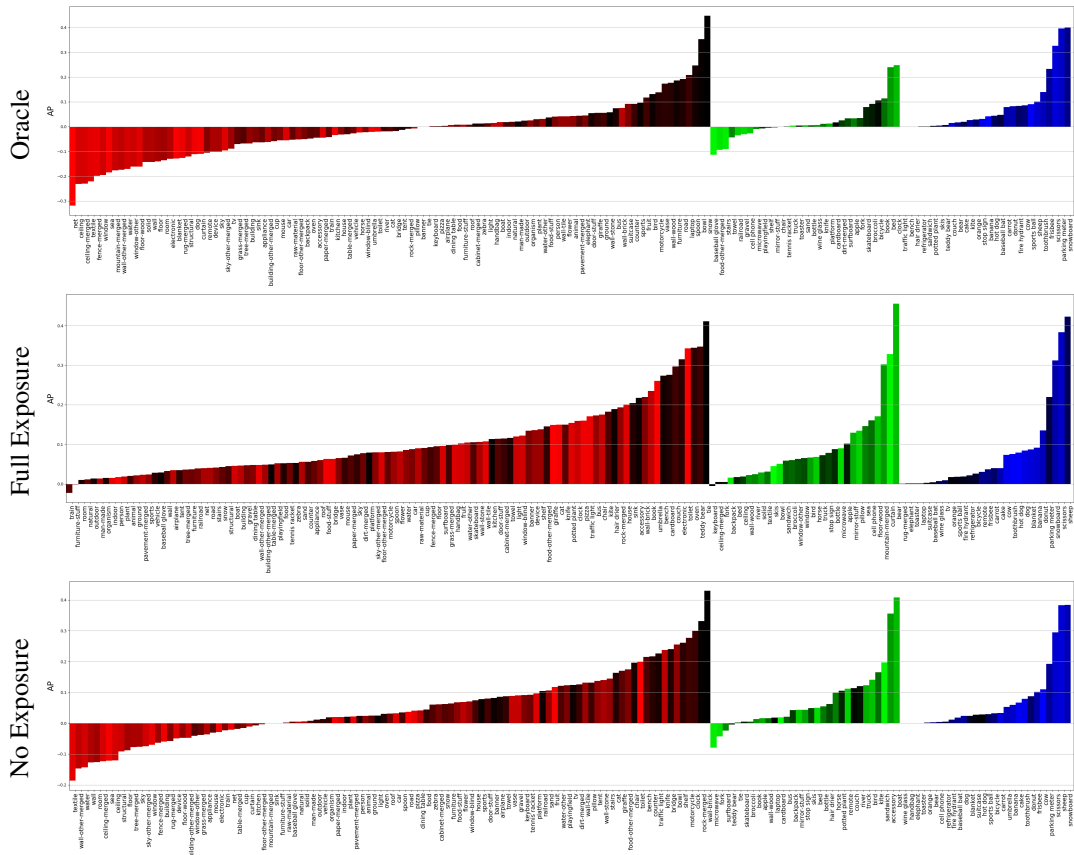

Figure 6: MS COCO Label-wise Performance (Sorted by the AP score). Increasing color brightness of the bars indicate increasing **fraction of missing annotations**.

118 [3] Thibaut Durand, Nazanin Mehrasa, and Greg Mori. Learning a deep convnet for multi-label classification  
119 with partial labels. In *CVPR*, 2019.

120 [4] Robert M. French. Catastrophic forgetting in connectionist networks. *Trends in Cognitive Sciences*,  
121 3(4):128 – 135, 1999.

122 [5] Ian J. Goodfellow, Mehdi Mirza, Da Xiao, Aaron Courville, and Yoshua Bengio. An empirical investigation  
123 of catastrophic forgetting in gradient-based neural networks, 2013.

124 [6] Agrim Gupta, Piotr Dollar, and Ross Girshick. LVIS: A dataset for large vocabulary instance segmentation.  
125 In *CVPR*, 2019.

126 [7] Alexander Kirillov, Kaiming He, Ross Girshick, Carsten Rother, and Piotr Dollár. Panoptic segmentation.  
127 In *CVPR*, pages 9404–9413, 2019.

128 [8] Alex Krizhevsky, Geoffrey Hinton, et al. Learning multiple layers of features from tiny images. Technical  
129 report, Citeseer, 2009.

130 [9] Zhizhong Li and Derek Hoiem. Learning without forgetting. *IEEE TPAMI*, 40(12):2935–2947, 2017.

131 [10] Tsung-Yi Lin, Michael Maire, Serge Belongie, James Hays, Pietro Perona, Deva Ramanan, Piotr Dollár,  
132 and C Lawrence Zitnick. Microsoft coco: Common objects in context. In *ECCV*, 2014.

133 [11] Michael McCloskey and Neal J Cohen. Catastrophic interference in connectionist networks: The sequential  
134 learning problem. In *Psychology of learning and motivation*, volume 24, pages 109–165. Elsevier, 1989.

135 [12] Roger Ratcliff. Connectionist models of recognition memory: constraints imposed by learning and  
136 forgetting functions. *Psychological review*, 97(2):285, 1990.

137 [13] Rupesh K Srivastava, Jonathan Masci, Sohrab Kazerounian, Faustino Gomez, and Jürgen Schmidhuber.  
138 Compete to compute. In *NIPS*, pages 2310–2318. 2013.

139 [14] Huiyu Wang, Aniruddha Kembhavi, Ali Farhadi, Alan L Yuille, and Mohammad Rastegari. Elastic:  
140 Improving cnns with dynamic scaling policies. In *CVPR*, pages 2258–2267, 2019.

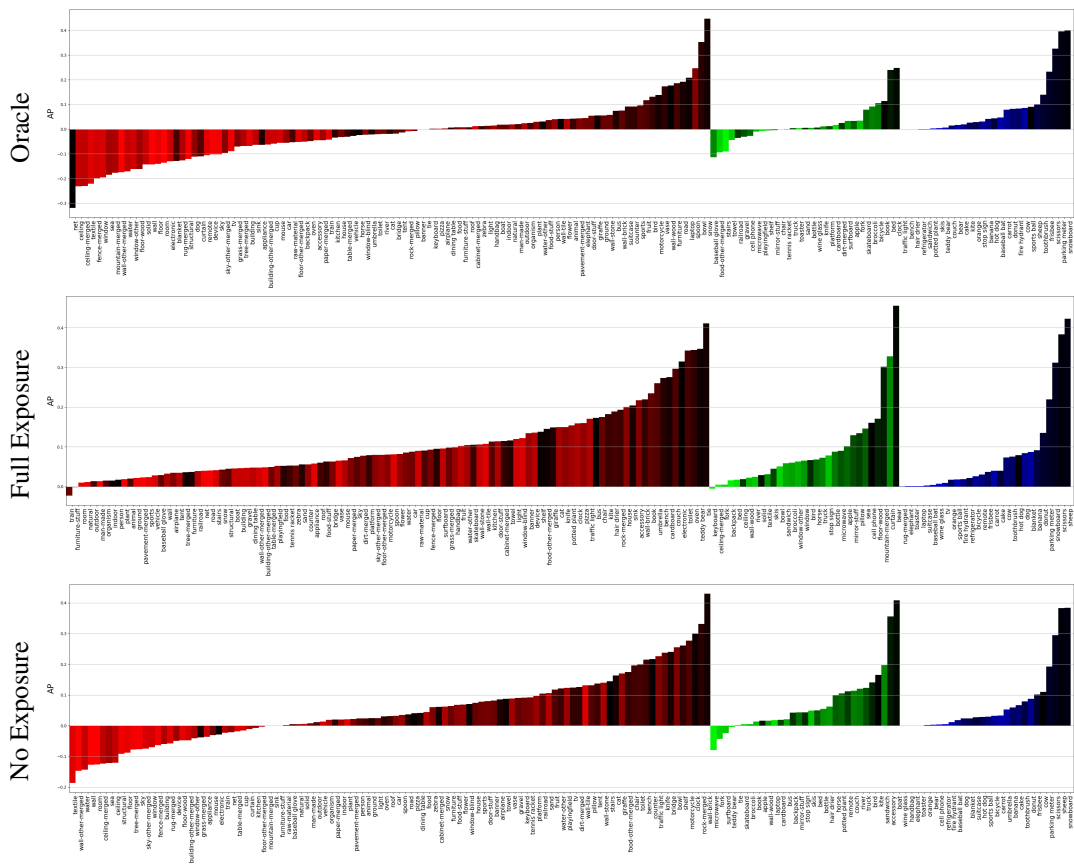

Figure 7: MS COCO Label-wise Performance (Sorted by the AP score). Increasing color brightness of the bars indicate increasing # oracle annotations.

141 **A CIFAR Knowledge Graph**

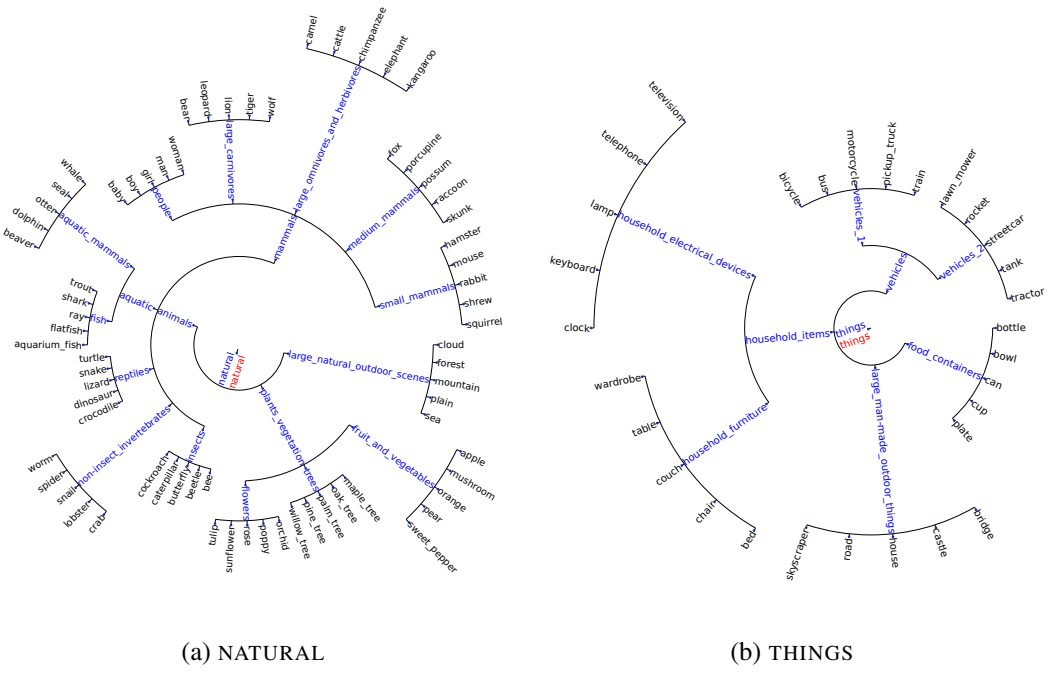

Figure 8: CIFAR100 Knowledge Graph

142



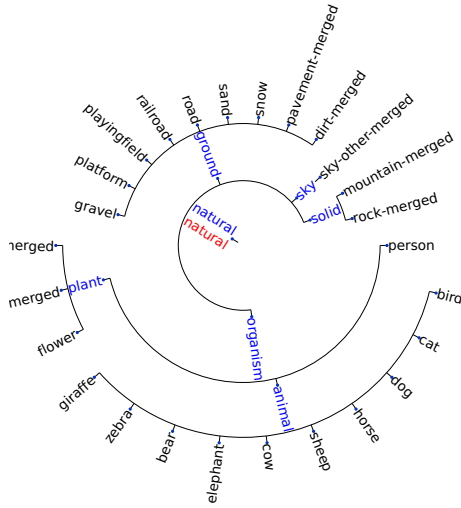

(a) NATURAL

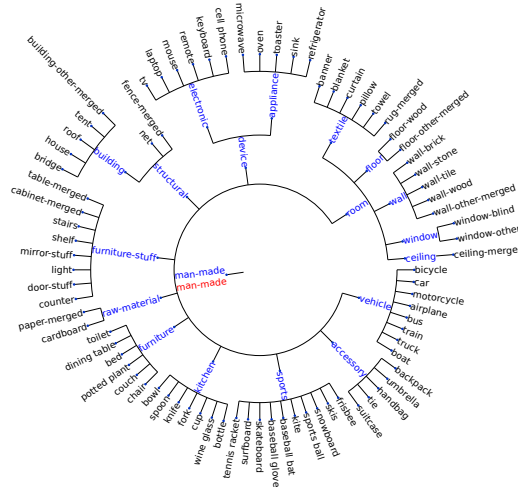

(b) MAN-MADE

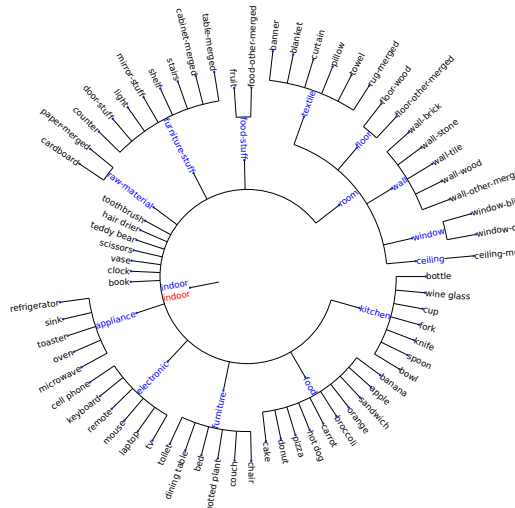

(a) INDOOR

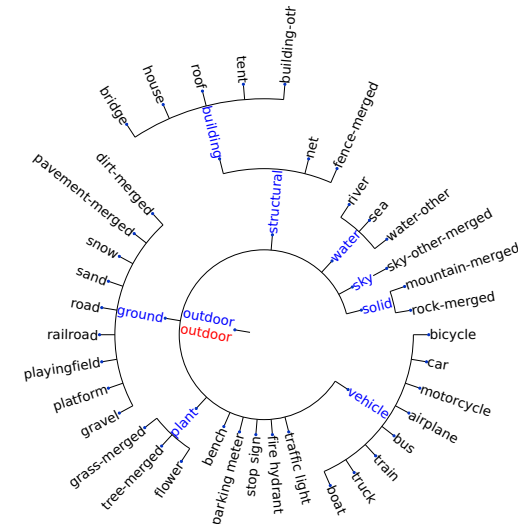

(b) OUTDOOR

Figure 9: MS-COCO Knowledge Graph
